# Supplementary material
Source: Elsevier journal article supplement (https://comptes-rendus.academie-sciences.fr/geoscience/article/10.1016/j.crte.2018.12.002/file/attach/mmc1.pdf)
Supplement: mmc1 [file mmc1.pdf]

# Tectono-metamorphic evolution and stratigraphy of the European continental margin involved in the Alpine subduction: New insights from Alpine Corsica, France

Maria Di Rosa, Chiara Frassi, Francesca Meneghini, Michele Marroni, Luca Pandolfi, Alberto De Giorgi

## Supplementary Material

**Fig. Sm1.** Mesoscopic and microscopic aspects of the studied rocks. (a) Macrophotograph of S0+S2 foliation in the Metabreccia Fm. (CPU, Corte area), F2 isoclinal folds and F3 folds in Metabreccia Fm., Corte area (CPU). A.P.2: F2 axial plane; A.P.3: F3 axial plane. (b) Photomicrograph of S1 foliation (S1) preserved within D2 microlithon in the F2 hinge zone of the Metasandstone Fm., PPU, Corte area, sample CM32C. S2: S2 foliation; Wm: white mica; Chl: chlorite. Metabreccia Fm., Corte area (CDU, sample CM24C). (c) cm-sized F3 fold in foliated metagranitoids, Ghisoni area (GHU). (d) Photomicrograph of metagranitoids, Ghisoni area (GHU, sample GHI21). The granoblastic layer consists of recrystallized quartz (Qtz) affected by incipient subgrain rotation recrystallization mechanism. ng: new grain of quartz; og: old grain of quartz; Wm: white mica.

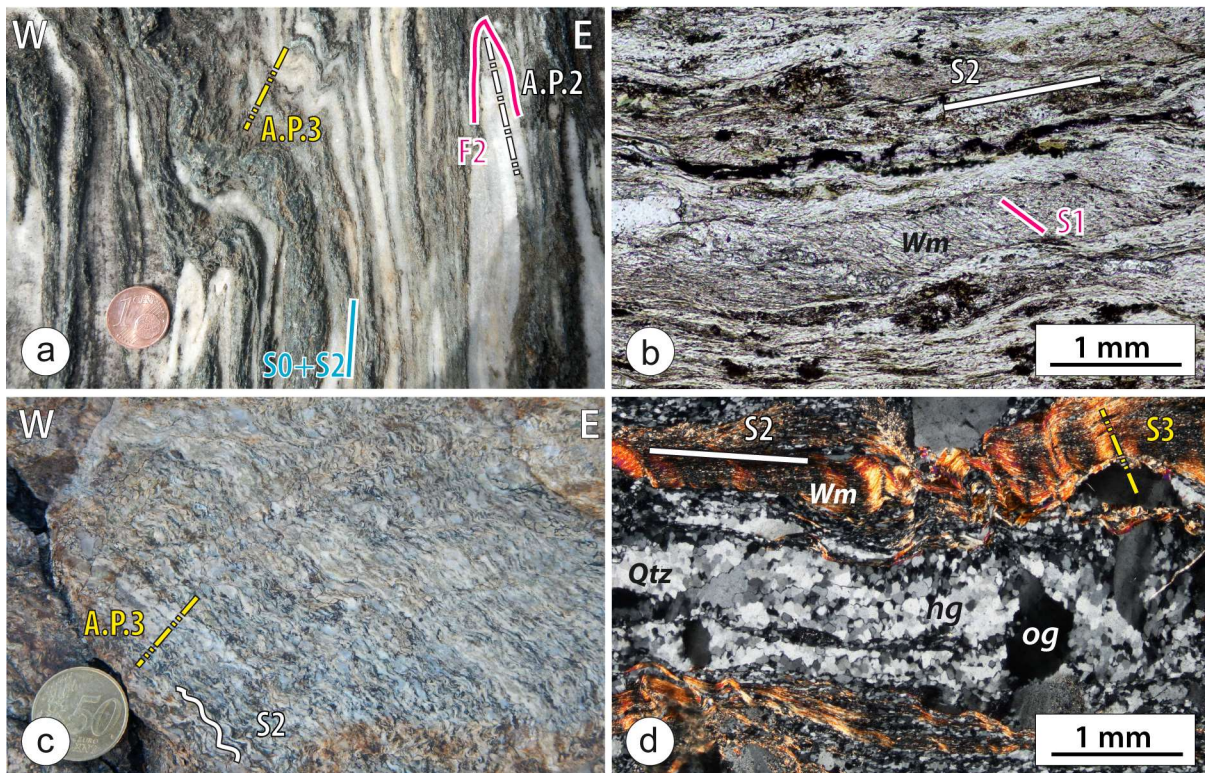

**Fig. Sm2.** Additional mesoscopic and microscopic pictures of the deformation history of the Lower Units. (a) S–C' fabric in the Detritic Metalimestone Fm., Castiglione–Popolasca Unit, Corte area (C': shear plane; S2: S2 foliation); (b) S–C' microfabric in the Metavolcanic and Metavolcaniclastic Fm., sample CMD51, Ghisoni area; crossed Nicols (C': shear plane; S2: S2 foliation; ulmy: ultramylonite layer); (c) S2 mylonitic foliation in metagranitoids, GHI22, Ghisoni area, crossed Nicols (S2: S2 foliation; Wm: white micas; Qtz: quartz; Pl: plagioclase); (d)  $\sigma$ -type amphibole porphyroblast in the epidote-bearing metagabbros, Ghisoni Unit, sample GHI18, parallel Nicols.

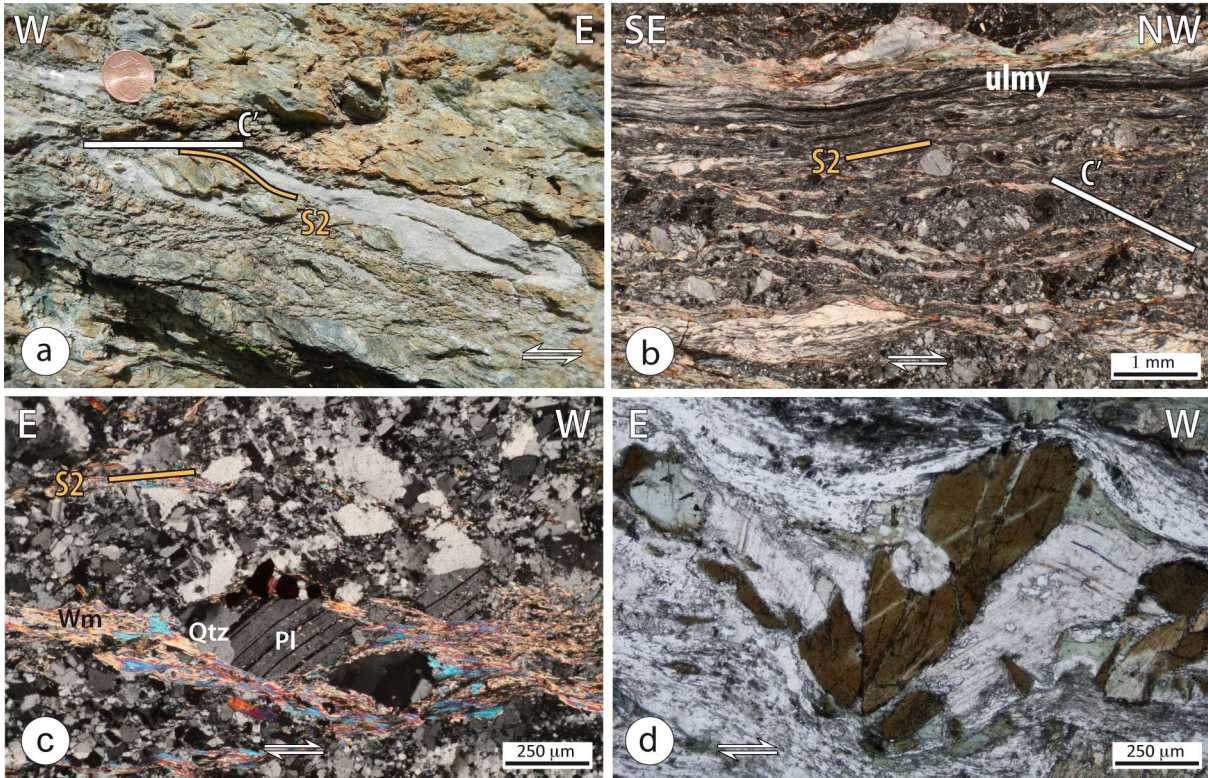

**Fig. Sm3.** Ternary diagrams showing the proportion in each sample of chlorite (a) and phengite (b) end-members. (c) Si-intensity map acquired with EPMA. (d)  $P$ - $T$  equilibrium conditions of the three generations of Chl-Phg couples (the error of each cross is  $\pm 0.2$  GPa and  $\pm 30^\circ\text{C}$ ). The dots in the maps indicate the sampled microareas from which the  $P$ - $T$  estimates were obtained.

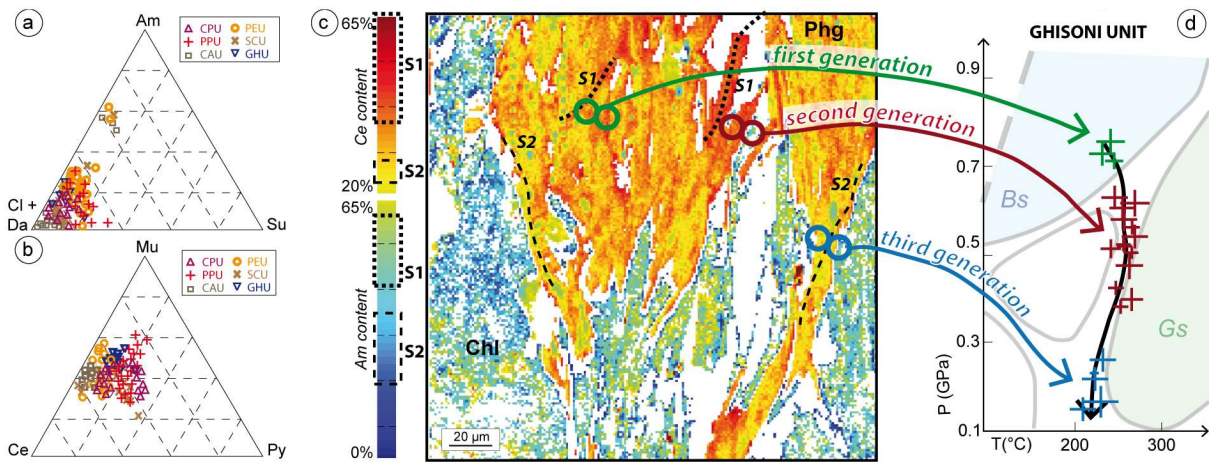

**Table Sm1.** Representative electron microprobe analysis of the Chl–Phg pairs selected in the samples of metapelites.

| Sample                         | CAU (CMD80A)             |           |                          |           |           |           | PEU (CMD83A)             |       |                          |       |           |       | SCU (CM34B)              |           |                          |       |       |       |
|--------------------------------|--------------------------|-----------|--------------------------|-----------|-----------|-----------|--------------------------|-------|--------------------------|-------|-----------|-------|--------------------------|-----------|--------------------------|-------|-------|-------|
| Domain                         | S1 ( $P_{\text{peak}}$ ) |           | S1 ( $T_{\text{peak}}$ ) |           | S2        |           | S1 ( $P_{\text{peak}}$ ) |       | S1 ( $T_{\text{peak}}$ ) |       | S2        |       | S1 ( $P_{\text{peak}}$ ) |           | S1 ( $T_{\text{peak}}$ ) |       | S2    |       |
| Analyse                        | Chl7<br>0                | Phg6<br>7 | Chl1<br>6                | Phg4<br>3 | Chl1<br>9 | Phg7<br>2 | Chl2                     | Phg5  | Chl8                     | Phg1  | Chl1<br>0 | Phg2  | Chl1                     | Phg1<br>0 | Chl6                     | Phg8  | Chl5  | Phg7  |
| <b>Wt%</b>                     |                          |           |                          |           |           |           |                          |       |                          |       |           |       |                          |           |                          |       |       |       |
| SiO <sub>2</sub>               | 25.94                    | 51.57     | 27.26                    | 52.70     | 27.68     | 51.28     | 23.35                    | 49.63 | 23.06                    | 47.54 | 24.23     | 50.59 | 24.14                    | 55.90     | 26.42                    | 50.93 | 27.33 | 51.27 |
| TiO <sub>2</sub>               | 0.01                     | 0.05      | 0.01                     | 0.06      | 0.01      | 0.06      | 0.07                     | 0.18  | 0.03                     | 0.14  | 2.26      | 0.43  | 0.04                     | 0.06      | 0.03                     | 0.05  | 0.04  | 0.06  |
| Al <sub>2</sub> O <sub>3</sub> | 18.87                    | 26.81     | 17.31                    | 25.42     | 17.75     | 24.07     | 19.85                    | 22.91 | 15.70                    | 26.61 | 16.53     | 23.08 | 17.57                    | 24.29     | 16.47                    | 24.65 | 16.60 | 24.22 |
| FeO                            | 21.76                    | 4.02      | 22.24                    | 4.23      | 22.69     | 4.31      | 31.70                    | 9.43  | 31.37                    | 8.91  | 32.07     | 6.57  | 27.82                    | 4.53      | 27.10                    | 5.07  | 27.08 | 4.68  |
| MnO                            | 0.42                     | 0.04      | 0.42                     | 0.04      | 0.37      | 0.03      | 0.79                     | 0.09  | 0.29                     | 0.05  | 0.46      | 0.08  | 0.25                     | 0.05      | 0.56                     | 0.06  | 0.38  | 0.04  |
| MgO                            | 15.91                    | 3.49      | 18.58                    | 3.82      | 18.15     | 4.19      | 10.24                    | 2.85  | 5.01                     | 1.91  | 7.11      | 2.37  | 11.79                    | 3.79      | 12.32                    | 3.82  | 12.47 | 3.71  |
| CaO                            | 0.15                     | 0.07      | 0.21                     | 0.08      | 0.13      | 0.08      | 0.08                     | 0.06  | 0.25                     | 0.06  | 0.10      | 0.23  | 0.11                     | 0.03      | 0.13                     | 0.03  | 0.13  | 0.03  |
| Na <sub>2</sub> O              | 0.04                     | 0.04      | 0.04                     | 0.05      | 0.03      | 0.05      | 0.02                     | 0.15  | 0.06                     | 0.06  | 0.02      | 0.45  | 0.02                     | 0.02      | 0.02                     | 0.02  | 0.02  | 0.02  |
| K <sub>2</sub> O               | 0.05                     | 10.38     | 0.08                     | 8.53      | 0.06      | 14.34     | 0.09                     | 10.00 | 0.31                     | 10.85 | 0.18      | 8.68  | 0.38                     | 8.39      | 0.41                     | 8.28  | 0.46  | 8.27  |
| tot.                           | 83.15                    | 96.46     | 86.15                    | 94.94     | 86.87     | 98.41     | 86.19                    | 95.30 | 76.06                    | 96.13 | 82.96     | 92.48 | 82.12                    | 97.05     | 82.45                    | 92.90 | 84.51 | 92.29 |
| <b>Cations</b>                 |                          |           |                          |           |           |           |                          |       |                          |       |           |       |                          |           |                          |       |       |       |
| Si                             | 2.84                     | 3.42      | 2.88                     | 3.51      | 2.91      | 3.43      | 2.63                     | 3.44  | 2.98                     | 3.27  | 2.85      | 3.52  | 2.80                     | 3.62      | 2.92                     | 3.48  | 3.04  | 3.52  |
| Ti                             | –                        | –         | –                        | –         | –         | –         | 0.01                     | 0.01  | –                        | 0.01  | 0.20      | 0.02  | –                        | –         | –                        | –     | –     | –     |
| Al                             | 2.44                     | 2.10      | 2.16                     | 2.00      | 2.20      | 1.90      | 2.63                     | 1.87  | 2.39                     | 2.16  | 2.29      | 1.89  | 2.40                     | 1.86      | 2.23                     | 1.99  | 2.17  | 1.96  |
| Fe <sup>2+</sup>               | 1.99                     | 0.22      | 1.97                     | 0.34      | 1.99      | 0.24      | 2.98                     | 0.55  | 3.39                     | 0.51  | 3.15      | 0.38  | 2.70                     | 0.25      | 2.60                     | 0.29  | 2.52  | 0.27  |
| Mn                             | 0.04                     | –         | 0.04                     | –         | 0.03      | –         | 0.08                     | 0.01  | 0.03                     | –     | 0.05      | 0.01  | 0.03                     | –         | 0.05                     | –     | 0.04  | –     |
| Mg                             | 2.59                     | 0.35      | 2.94                     | 0.38      | 2.84      | 0.42      | 1.72                     | 0.29  | 0.97                     | 0.20  | 1.25      | 0.25  | 2.04                     | 0.37      | 2.11                     | 0.39  | 2.06  | 0.38  |
| Ca                             | 0.03                     | –         | 0.02                     | –         | 0.02      | 0.01      | 0.01                     | –     | 0.04                     | –     | 0.01      | 0.02  | 0.01                     | –         | 0.02                     | –     | 0.01  | –     |
| Na                             | –                        | –         | 0.01                     | 0.01      | 0.01      | 0.01      | –                        | 0.02  | 0.01                     | 0.01  | 0.01      | 0.06  | –                        | –         | –                        | –     | –     | –     |
| K                              | 0.01                     | 0.88      | 0.01                     | 0.72      | 0.01      | 1.22      | 0.01                     | 0.88  | 0.05                     | 0.95  | 0.03      | 0.77  | 0.06                     | 0.69      | 0.06                     | 0.72  | 0.07  | 0.72  |
| sum ox                         | 14                       | 11        | 14                       | 11        | 14        | 11        | 14                       | 11    | 14                       | 11    | 14        | 11    | 14                       | 11        | 14                       | 11    | 14    | 11    |

| Sample                         | CPU (CM22B)              |         |                          |        |        |         | PPU (CM21)               |        |                          |        |        |       | GHU (CMD50D)             |           |                          |         |        |         |
|--------------------------------|--------------------------|---------|--------------------------|--------|--------|---------|--------------------------|--------|--------------------------|--------|--------|-------|--------------------------|-----------|--------------------------|---------|--------|---------|
| Domain                         | S1 ( $P_{\text{peak}}$ ) |         | S1 ( $T_{\text{peak}}$ ) |        | S2     |         | S1 ( $P_{\text{peak}}$ ) |        | S1 ( $T_{\text{peak}}$ ) |        | S2     |       | S1 ( $P_{\text{peak}}$ ) |           | S1 ( $T_{\text{peak}}$ ) |         | S2     |         |
| Analyse                        | Chl 757                  | Phg 269 | Chl 856                  | Phg 55 | Chl 26 | Phg 136 | Chl 31                   | Phg 18 | Chl 18                   | Phg 13 | Chl 12 | Phg 5 | Chl 24145                | Phg 11120 | Chl 48                   | Phg 124 | Chl 43 | Phg 322 |
| <b>Wt%</b>                     |                          |         |                          |        |        |         |                          |        |                          |        |        |       |                          |           |                          |         |        |         |
| SiO <sub>2</sub>               | 25.77                    | 50.81   | 27.22                    | 52.92  | 28.14  | 45.36   | 28.27                    | 48.40  | 25.58                    | 50.22  | 30.67  | 55.27 | 28.65                    | 49.57     | 28.19                    | 50.58   | 28.21  | 50.08   |
| TiO <sub>2</sub>               | 0.03                     | 0.27    | 0.03                     | 0.18   | 0.03   | 0.23    | 0.02                     | 0.11   | 0.03                     | 0.12   | 0.03   | 0.21  | 0.22                     | 0.04      | 0.03                     | 0.06    | 0.04   | 0.04    |
| Al <sub>2</sub> O <sub>3</sub> | 19.68                    | 20.86   | 22.35                    | 28.77  | 19.51  | 22.06   | 22.61                    | 30.56  | 20.98                    | 29.77  | 23.67  | 28.36 | 22.94                    | 28.25     | 22.15                    | 29.18   | 19.08  | 29.03   |
| FeO                            | 24.47                    | 4.30    | 23.58                    | 3.48   | 24.85  | 4.19    | 22.54                    | 3.31   | 26.91                    | 3.06   | 19.87  | 3.48  | 22.10                    | 4.26      | 21.70                    | 4.00    | 22.51  | 3.61    |
| MnO                            | 0.42                     | 0.02    | 0.36                     | 0.03   | 0.36   | 0.04    | 0.04                     | 2.29   | 0.03                     | 2.27   | 0.03   | 0.03  | 0.58                     | 0.04      | 0.63                     | 0.05    | 0.60   | 0.03    |
| MgO                            | 14.94                    | 3.17    | 13.21                    | 3.65   | 15.15  | 2.69    | 13.99                    | 0.03   | 13.36                    | 0.03   | 13.19  | 3.62  | 18.03                    | 3.19      | 17.76                    | 2.83    | 18.92  | 2.67    |
| CaO                            | 0.01                     | 0.04    | 0.01                     | 0.01   | 0.01   | 0.03    | 0.04                     | 0.01   | 0.04                     | 0.01   | 0.03   | 0.02  | 0.04                     | 0.05      | 0.05                     | 0.07    | 0.09   | 0.05    |
| Na <sub>2</sub> O              | 0.02                     | 0.17    | 0.02                     | 0.03   | 0.02   | 0.07    | 0.05                     | 0.14   | 0.05                     | 0.15   | 0.05   | 0.04  | 0.01                     | 0.11      | 0.03                     | 0.11    | 0.02   | 0.12    |
| K <sub>2</sub> O               | 0.05                     | 7.13    | 0.02                     | 8.21   | 0.02   | 7.90    | 0.68                     | 8.98   | 0.06                     | 9.01   | 1.12   | 8.29  | 0.01                     | 9.85      | 0.01                     | 9.87    | 0.02   | 10.28   |
| tot.                           | 85.57                    | 86.77   | 86.8                     | 97.28  | 88.09  | 82.57   | 88.24                    | 93.83  | 87.04                    | 94.64  | 88.66  | 99.32 | 92.58                    | 95.36     | 90.55                    | 96.75   | 89.49  | 95.91   |
| <b>Cations</b>                 |                          |         |                          |        |        |         |                          |        |                          |        |        |       |                          |           |                          |         |        |         |
| Si                             | 2.97                     | 3.86    | 3.04                     | 3.62   | 3.13   | 3.69    | 3.10                     | 3.48   | 2.91                     | 3.56   | 3.29   | 3.69  | 3.02                     | 3.54      | 3.04                     | 3.54    | 3.1    | 3.55    |
| Ti                             | –                        | 0.02    | –                        | 0.01   | –      | 0.02    | –                        | 0.01   | –                        | 0.01   | –      | 0.01  | 0.02                     | –         | –                        | –       | –      | –       |
| Al                             | 2.29                     | 1.59    | 2.50                     | 1.97   | 2.17   | 1.79    | 2.48                     | 2.20   | 2.39                     | 2.11   | 2.54   | 1.89  | 2.41                     | 2.01      | 2.39                     | 2.04    | 2.10   | 2.06    |
| Fe <sup>2+</sup>               | 2.83                     | 0.33    | 2.64                     | 0.24   | 2.76   | 0.34    | 2.47                     | 0.24   | 3.06                     | 0.22   | 2.13   | 0.23  | 2.33                     | 0.3       | 2.34                     | 0.28    | 2.48   | 0.26    |
| Mn                             | 0.05                     | –       | 0.04                     | –      | 0.04   | –       | –                        | 0.16   | –                        | 0.16   | –      | –     | 0.06                     | –         | 0.07                     | –       | 0.07   | –       |
| Mg                             | 1.72                     | 0.24    | 1.48                     | 0.25   | 1.68   | 0.22    | 1.54                     | –      | 1.52                     | –      | 1.41   | 0.24  | 1.90                     | 0.23      | 1.92                     | 0.20    | 2.08   | 0.19    |
| Ca                             | –                        | –       | –                        | –      | –      | –       | 0.01                     | 0.01   | 0.01                     | 0.01   | 0.01   | –     | –                        | –         | 0.01                     | –       | 0.01   | –       |
| Na                             | –                        | 0.01    | –                        | –      | –      | –       | 0.07                     | 0.65   | 0.01                     | 0.64   | 0.12   | 0.55  | –                        | 0.01      | –                        | 0.01    | –      | –       |
| K                              | 0.01                     | 0.54    | –                        | 0.56   | –      | 0.64    | 3.10                     | 3.48   | 2.91                     | 3.56   | 3.29   | 3.69  | –                        | 0.7       | –                        | 0.69    | –      | 0.73    |
| sum ox                         | 14                       | 11      | 14                       | 11     | 14     | 11      | 14                       | 11     | 14                       | 11     | 14     | 11    | 14                       | 11        | 14                       | 11      | 14     | 11      |

–: below detection limits

**Table Sm2**  $P$ - $T$  estimates for the three generations of Chl-Phg pairs in the six studied units.  $P$ - $T$  estimates of CPU and PPU are after Di Rosa et al. (2017a). The results (Chl-Phg 1<sup>st</sup>, 2<sup>nd</sup> and 3<sup>rd</sup> generation) obtained with the Chl-Phg-quartz-water multiequilibrium approach (Vidal and Parra, 2000) are compared with classical thermobarometric methods ( $P_{\max}$  and  $T_{\max}$ ).

|                  | unit | Chl-Phg 1 <sup>st</sup> generation | Chl-Phg 2 <sup>nd</sup> generation | Chl-Phg 3 <sup>rd</sup> generation | $P_{\max}$ (Massonne and Schreyer, 1987) |          | $T_{\max}$ |                                          |
|------------------|------|------------------------------------|------------------------------------|------------------------------------|------------------------------------------|----------|------------|------------------------------------------|
|                  |      | D1 PHASE                           |                                    |                                    |                                          | D2 PHASE |            |                                          |
|                  |      | $T$ (°C)                           | $P$ (GPa)                          | $T$ (°C)                           | $P$ (GPa)                                | $T$ (°C) | $P$ (GPa)  | $T$ (°C)                                 |
| CIMA PEDANI area | CAU  | 176-262                            | 1.04-0.82                          | 393-455                            | 0.76-0.63                                | 310-247  | 0.45-0.33  | 1.08<br>470<br>(Hillier and Velde, 1991) |
|                  | PEU  | 280-360                            | 1.35-0.80                          | 440-435                            | 0.75-0.45                                | 351-237  | 0.35-0.23  | 1.25<br>452<br>(Cathelineau, 1988)       |
|                  | SCU  | 277-280                            | 1.34-0.90                          | 435-388                            | 0.83-0.51                                | 312-278  | 0.31-0.26  | 0.81<br>401<br>(Lanari et al., 2014)     |
| CORTE area       | PPU  | 200-240                            | 1.04-0.75                          | 340-400                            | 0.80-0.51                                | 300-240  | 0.30-0.23  | 1.19<br>344<br>(Lanari et al., 2014)     |
|                  | CPU  | 250-330                            | 1.22-1.00                          | 350-320                            | 0.80-0.56                                | 310-230  | 0.36-0.25  | 1.26<br>350<br>(Lanari et al., 2014)     |
| GHISONI area     | GHU  | 245-250                            | 0.81-0.72                          | 263-243                            | 0.68-0.39                                | 228-209  | 0.30-0.13  | 0.92<br>272<br>(Lanari et al., 2014)     |

## References

Cathelineau, M., 1988. Cation site occupancy in chlorites and illites as a function of temperature. *Clay Minerals* 23, 471–485.

Di Rosa, M., De Giorgio, A., Marroni, M., Vidal, O., 2017. Syn-convergence exhumation of continental crust: evidence from structural and metamorphic analysis of the Monte Cecu area, Alpine Corsica (Northern Corsica, France). *Geol. J.* 52, 019-937.

Hillier, S., Velde, B., 1991. Octahedral occupancy and the chemical composition of diagenetic (low-temperature) chlorites. *Clay Minerals* 26, 146–168.

Lanari, P., Wagner, T., Vidal, O. 2014. A thermodynamic model for di-trioctahedral chlorite from experimental and natural data in the system  $\text{MgO-FeO-Al}_2\text{O}_3\text{-SiO}_2\text{-H}_2\text{O}$ : applications to  $P$ - $T$  sections and geothermometry. *Contrib. Mineral. Petrol.* 167. doi:10.1007/s00410-014-0968-8.

Massonne, H.J., Schreyer, W., 1987. Phengite geobarometry based on the limiting assemblage with K-feldspar, phlogopite, and quartz. *Contrib. Mineral. Petr.* 96, 212–224.

Vidal, O., Parra, T., 2000. Exhumation paths of high-pressure metapelites obtained from local equilibria for chlorite–phengite assemblage. *Geol. J.* 35, 139–161.
